# Supplementary material for: Beyond the Whole-Genome Duplication: Phylogenetic Evidence for an Ancient Interspecies Hybridization in the Baker's Yeast Lineage
Source: PLoS Biol. 2015 Aug 7;13(8):e1002220. doi: 10.1371/journal.pbio.1002220 (PMC4529251; doi:10.1371/journal.pbio.1002220)
Supplement: S5 Table — For each break, indicated by an appropriate header, three groups of proteins are found. Each row represents orthologous genes, and each column represents one of the 12 species used. The ancestral genome predicted by Gordon et al. [11] is included. Post-WGDs are occupied by two columns each. For each break and each species, protein codes written in the same colour are found close to each other in the genome. Genes in black are genes that have no gene in close proximity within the set we are showing. For each break, the central set of genes, shown by five or six rows of genes, indicates the break in gene order that can be seen marked with a thick black line at the KLE columns (last four columns). At the break point, two proteins can be found at either side of the break. The genes located at either side of these genes can be found partly in the central set of genes and partly in the upper and lower set of genes. Empty rows indicate missing orthologs. Orthologs for the post-WGD were arranged in such a way as to maximize gene order conservation. (XLS) [file pbio.1002220.s020.xls]

## Sheet: S5 Table
Synteny break 1 – ZT-like
Z. rouxii	T. delbrueckii	Inferred ancestor	S. cerevisiae		T. blattae		K. naganishii		N. castellii		C. glabrata		K. lactis	E. gossypii	L. kluyveri	L. thermotolerans
ZYRO0B05522g	TDEL0D04880	Anc_3.136	YGR077C		TBLA0F01020			KNAG0K00970		NCAS0B05260	CAGL0K01221g		KLLA0C04554g	AER208C	SAKL0C08140g	KLTH0E15730g
ZYRO0B05544g	TDEL0D04890	Anc_3.135		YOL073C	TBLA0F01030			KNAG0K00960		NCAS0B05280	CAGL0K01199g		KLLA0C04532g	AER209W	SAKL0C08118g	KLTH0E15752g
ZYRO0A03806g	TDEL0D03910	Anc_3.233		YBR034C	TBLA0G02920		KNAG0J01020		NCAS0I01800	NCAS0A10330		CAGL0I04730g	KLLA0B07117g	AAR190W	SAKL0D04466g	KLTH0E15708g
ZYRO0A03828g	TDEL0D03920	Anc_3.232	YDR012W	YBR031W	TBLA0G02910		KNAG0J01030			NCAS0A10320	CAGL0B04257g		KLLA0B07139g	AAR191C	SAKL0D04488g	KLTH0E15686g
ZYRO0A03850g	TDEL0D03930	Anc_3.231		YBR030W	TBLA0G02900					NCAS0A10310	CAGL0B04279g		KLLA0B07161g	AAR193C	SAKL0D04532g	KLTH0E15664g
ZYRO0A03872g	TDEL0D03940	Anc_3.230		YBR029C	TBLA0G02890			KNAG0H01470		NCAS0A10300		CAGL0I04752g	KLLA0F24640g	AEL084W	SAKL0C08822g	KLTH0C08910g
ZYRO0A03894g	TDEL0D03950	Anc_3.229		YBR028C		TBLA0I01800	KNAG0J01290			NCAS0A10290	CAGL0B04301g		KLLA0F24618g	AEL083W	SAKL0C08844g	KLTH0C08932g
ZYRO0A03916g	TDEL0D03960	Anc_3.228		YBR026C	TBLA0G02880			KNAG0K01630		NCAS0A10280	CAGL0B04323g		KLLA0F24552g	AEL081W	SAKL0C08910g	KLTH0C09020g
ZYRO0B04950g	TDEL0D04620	Anc_3.160	YDL030W			TBLA0B01600		KNAG0K01120		NCAS0C03540	CAGL0K01573g		KLLA0F24662g	AEL085W	SAKL0C08800g	KLTH0C08888g
ZYRO0B04972g	TDEL0D04630	Anc_3.159	YDL031W			TBLA0B01590		KNAG0K01110		NCAS0C03530	CAGL0K01551g		KLLA0F24684g	AEL086W	SAKL0C08778g	KLTH0C08866g
Synteny break 2 – ZT like
Z. rouxii	T. delbrueckii	Inferred ancestor	S. cerevisiae		T. blattae		K. naganishii		N. castellii		C. glabrata		K. lactis	E. gossypii	L. kluyveri	L. thermotolerans
ZYRO0B06886g	TDEL0D05480	Anc_3.76		YOL107W		TBLA0B08400		KNAG0K00540		NCAS0C04750		CAGL0I07381g	KLLA0C12111g	AEL079W	SAKL0C09020g	KLTH0C09130g
ZYRO0B06930g	TDEL0D05490	Anc_3.75		YOL108C		TBLA0B08420		KNAG0K00550		NCAS0C04740		CAGL0I07359g	KLLA0F24509g	AEL080C	SAKL0C08976g	KLTH0C09086g
ZYRO0A03894g	TDEL0D03950	Anc_3.229		YBR028C		TBLA0I01800	KNAG0J01290			NCAS0A10290	CAGL0B04301g		KLLA0F24618g	AEL083W	SAKL0C08844g	KLTH0C08932g
ZYRO0A03916g	TDEL0D03960	Anc_3.228		YBR026C	TBLA0G02880			KNAG0K01630		NCAS0A10280	CAGL0B04323g		KLLA0F24552g	AEL081W	SAKL0C08910g	KLTH0C09020g
ZYRO0A03938g	TDEL0D03970	Anc_3.227		YBR036C	TBLA0G02870	TBLA0I01790	KNAG0K01310	KNAG0K01620	NCAS0E01610			CAGL0I04774g			SAKL0C08932g	KLTH0C09042g
ZYRO0A03960g	TDEL0D03980	Anc_3.226		YBR025C	TBLA0G02860			KNAG0K01610		NCAS0A10270	CAGL0B04345g		KLLA0D03608g	AEL192W	SAKL0C11814g	KLTH0A01782g
ZYRO0A03982g	TDEL0D03990	Anc_3.225	YBR037C	YBR024W	TBLA0G02850	TBLA0I01780	KNAG0K01320	KNAG0K01600	NCAS0E01620	NCAS0A10250	CAGL0B04367g	CAGL0I04796g	KLLA0D03630g	AEL191C	SAKL0C11792g	KLTH0A01804g
ZYRO0A04004g	TDEL0D04000	Anc_3.224	YBR038W		TBLA0G02840			KNAG0K01590		NCAS0A10240		CAGL0I04818g	KLLA0D03542g	AEL190W	SAKL0C11770g	KLTH0A01826g
ZYRO0B06996g	TDEL0E00830	Anc_3.74	YNL286W				KNAG0K02270		NCAS0A09830						SAKL0C11968g	KLTH0A01716g
ZYRO0B07018g	TDEL0E00820	Anc_3.73	YNL287W			TBLA0B08430	KNAG0K02280		NCAS0A09840		CAGL0M03531g		KLLA0E13289g	AEL193W	SAKL0C11990g	KLTH0A01694g
Synteny break 3 – ZT like
Z. rouxii	T. delbrueckii	Inferred ancestor	S. cerevisiae		T. blattae		K. naganishii		N. castellii		C. glabrata		K. lactis	E. gossypii	L. kluyveri	L. thermotolerans
ZYRO0B05654g	TDEL0D04930	Anc_3.130		YOL076W	TBLA0F01060		KNAG0K01940		NCAS0I02280			CAGL0I07997g	KLLA0E17777g	AER019C	SAKL0C10450g	KLTH0G16016g
ZYRO0B05676g	TDEL0D04940	Anc_3.129		YOL077C	TBLA0F01070			KNAG0K00930		NCAS0B05310		CAGL0I07975g	KLLA0E17799g	AER020W	SAKL0C10428g	KLTH0G15994g
ZYRO0A04906g	TDEL0H03370	Anc_3.190	YDL008W			TBLA0A00260	KNAG0J01250		NCAS0I01920		CAGL0I04576g		KLLA0E17711g	AER016C	SAKL0C10516g	KLTH0G16082g
ZYRO0A04928g	TDEL0D04320	Anc_3.189	YDL010W	YBR014C	TBLA0F00750		KNAG0J01260			NCAS0E01600	CAGL0I04554g		KLLA0E17733g	AER017C	SAKL0C10494g	KLTH0G16060g
ZYRO0A04950g	TDEL0D04330	Anc_3.188		YBR015C	TBLA0F00740	TBLA0A00270		KNAG0K01290		NCAS0E01590	CAGL0I04532g		KLLA0E17755g	AER018C	SAKL0C10472g	KLTH0G16038g
ZYRO0A04972g	TDEL0D04340	Anc_3.187	YDL012C	YBR016W	TBLA0F00730	TBLA0B01680		KNAG0K01285	NCAS0I01900		CAGL0I04510g	CAGL0K01903g	Klac_YGOB_Anc_3.187	AER212W	SAKL0C08008g	KLTH0E15840g
ZYRO0A04994g	TDEL0D04350	Anc_3.186	YDL013W		TBLA0F00720		KNAG0J01270		NCAS0I01910			CAGL0K01881g	KLLA0C04411g	AER213C	SAKL0C07964g	KLTH0E15884g
ZYRO0A05016g	TDEL0D04370	Anc_3.185	YDL014W			TBLA0B01670		KNAG0K01645	NCAS0I01890			CAGL0K01859g	KLLA0C04389g	AER214C	SAKL0C07942g	KLTH0E15906g
ZYRO0B05610g	TDEL0D04910	Anc_3.132	YBR137W		TBLA0F01050		KNAG0K01920		NCAS0I02260		CAGL0C00451g				SAKL0C08052g	KLTH0D14542g
ZYRO0B05632g	TDEL0D04920	Anc_3.131	YBR138C				KNAG0K01930		NCAS0I02270		CAGL0M10021g		KLLA0C04455g	AER211C	SAKL0C08030g	KLTH0E15818g
Synteny break 4 – ZT like
Z. rouxii	T. delbrueckii	Inferred ancestor	S. cerevisiae		T. blattae		K. naganishii		N. castellii		C. glabrata		K. lactis	E. gossypii	L. kluyveri	L. thermotolerans
ZYRO0C11220g	TDEL0A04960	Anc_5.630		YOR036W	TBLA0A09620		KNAG0B03100		NCAS0G00710		CAGL0I01012g		KLLA0E21759g	ACR092C	SAKL0G01782g	KLTH0F16742g
ZYRO0C11242g	TDEL0A04970	Anc_5.631	YDR267C		TBLA0A09610			KNAG0C06240		NCAS0C05310		CAGL0M08646g	KLLA0E21781g	ACR091W	SAKL0G01760g	KLTH0F16764g
ZYRO0A06446g	TDEL0E02180	Anc_5.406		YHR102W	TBLA0A03570	TBLA0H01660	KNAG0B04320		NCAS0H01940		CAGL0L11550g		KLLA0E21693g	ACL104C	SAKL0G01848g	KLTH0F16676g
ZYRO0A06468g	TDEL0E02190	Anc_5.405	YDR350C		TBLA0A03560			KNAG0C05120		NCAS0F03170		CAGL0A02475g	KLLA0E21715g	ACL103W	SAKL0G01826g	KLTH0F16698g
ZYRO0A06490g	TDEL0E02200	Anc_5.404		YHR101C		TBLA0H01670	KNAG0B04330		NCAS0H01930		CAGL0L11528g		KLLA0E21737g	ACR093C	SAKL0G01804g	KLTH0F16720g
ZYRO0A06512g	TDEL0E02210	Anc_5.403		YHR100C	TBLA0A03550		KNAG0B04340	KNAG0K00160	NCAS0H01920		CAGL0H04389g		KLLA0E16633g	AER392W	SAKL0G07414g	KLTH0E02508g
ZYRO0A06534g	TDEL0E02220	Anc_5.402		YHR099W	TBLA0A03540			KNAG0C05130		NCAS0F03160	CAGL0A01914g		KLLA0F22066g	AER393C	SAKL0G07458g	KLTH0E02530g
ZYRO0A06578g	TDEL0E02230	Anc_5.401	YDR349C			TBLA0H01680		KNAG0C05140		NCAS0F03150		CAGL0A02431g	KLLA0F22088g	ACR150W	SAKL0G07524g	KLTH0E02596g
ZYRO0A06600g	TDEL0E02240	Anc_5.400		YHR098C	TBLA0A03530	TBLA0H01690	KNAG0B04350		NCAS0H01910		CAGL0A01848g		KLLA0F22110g	ACR151W	SAKL0G07546g	KLTH0E02618g
ZYRO0C11176g	TDEL0A04940	Anc_5.628	YDR265W		TBLA0A09640			KNAG0J01560		NCAS0C05290		CAGL0M08690g	KLLA0E16677g	AER390W	SAKL0G07370g	KLTH0E02464g
ZYRO0C11198g	TDEL0A04950	Anc_5.629	YDR266C		TBLA0A09630		KNAG0B03110		NCAS0G00740	NCAS0C05300		CAGL0M08668g	KLLA0E16655g	AER391C	SAKL0G07392g	KLTH0E02486g
Synteny break 5 – ZT like
Z. rouxii	T. delbrueckii	Inferred ancestor	S. cerevisiae		T. blattae		K. naganishii		N. castellii		C. glabrata		K. lactis	E. gossypii	L. kluyveri	L. thermotolerans
ZYRO0E02750g	TDEL0B05490	Anc_8.114	YPR010C-A			TBLA0E03920	KNAG0D02310		NCAS0B04680			CAGL0J01699g	KLLA0D04334g		SAKL0H20504g	KLTH0H08866g
ZYRO0E02772g	TDEL0B05480												KLLA0D04356g		SAKL0H20526g	KLTH0H08888g
ZYRO0A12012g	TDEL0D02950	Anc_4.156		YLR330W	TBLA0G00570			KNAG0B05480		NCAS0J00880	CAGL0G00814g		KLLA0D04422g	AGL051C	SAKL0H20592g	KLTH0H08954g
ZYRO0A12034g	TDEL0D02940	Anc_4.157	YGR020C		TBLA0G00580		KNAG0D03820		NCAS0A01930			CAGL0D04048g	KLLA0D04400g	AGL052W	SAKL0H20570g	KLTH0H08932g
ZYRO0A12056g	TDEL0D02930	Anc_4.158	YGR021W		TBLA0G00590		KNAG0D03830		NCAS0A01940			CAGL0D04070g	KLLA0D04378g	AGL053C	SAKL0H20548g	KLTH0H08910g
ZYRO0A12100g	TDEL0D02920	Anc_4.159	YGR023W	YLR332W	TBLA0G00600	TBLA0G01230	KNAG0D03840	KNAG0B05490	NCAS0A01950	NCAS0J00870	CAGL0G00858g	CAGL0J00253g	KLLA0A03179g	AEL302W	SAKL0B03608g	KLTH0G17226g
ZYRO0A12144g	TDEL0D02910	Anc_4.161	YGR024C		TBLA0G01180		KNAG0D03850		NCAS0A01970			CAGL0J00209g	KLLA0B06237g	ABR031C	SAKL0B03696g	KLTH0G17270g
ZYRO0A12166g	TDEL0D02900	Anc_4.162	YGR026W		TBLA0G01170	TBLA0G01240	KNAG0D03860		NCAS0A01980			CAGL0J00187g	KLLA0B06215g	ABR032W	SAKL0B03718g	KLTH0G18106g
ZYRO0A12254g	TDEL0D02890	Anc_4.163	YGR027C	YLR333C		TBLA0G01250		KNAG0B05590		NCAS0J00780		CAGL0J00165g	KLLA0B06182g	ABR033C	SAKL0B03806g	KLTH0G18018g
ZYRO0E02838g	TDEL0B05470	Anc_8.113	YPR010C			TBLA0E03910	KNAG0D02320			NCAS0C04240		CAGL0J01848g	KLLA0B06303g	ABR029W	SAKL0B03542g	KLTH0G17160g
ZYRO0E02860g	TDEL0B05460	Anc_8.112		YGL167C	TBLA0C00190			KNAG0E03400		NCAS0C04250	CAGL0I04312g	CAGL0J01870g	KLLA0A03157g	AEL301W	SAKL0B03520g	KLTH0G17138g
Synteny break 6 – KLE like
Z. rouxii	T. delbrueckii	Inferred ancestor	S. cerevisiae		T. blattae		K. naganishii		N. castellii		C. glabrata		K. lactis	E. gossypii	L. kluyveri	L. thermotolerans
ZYRO0E05632g	TDEL0B06340	Anc_2.545	YKL034W			TBLA0I01490		KNAG0A07090		NCAS0A04760	CAGL0L01947g		KLLA0F25674g	AFR275W	SAKL0A09812g	KLTH0D07216g
ZYRO0E05654g	TDEL0B06350	Anc_2.546	YKL035W	YHL012W	TBLA0G02340	TBLA0I01540	KNAG0C05630		NCAS0A12570		CAGL0L01925g		KLLA0F25652g	AGL082W	SAKL0A09834g	KLTH0D07238g
ZYRO0B02244g	TDEL0A03180	Anc_2.542		YHL010C	TBLA0G02310			KNAG0C05660	NCAS0A12550			CAGL0K02563g	KLLA0F25740g	AGL079C	SAKL0A09746g	KLTH0D07150g
ZYRO0B02266g	TDEL0A03190	Anc_2.543		YHL011C	TBLA0G02320	TBLA0I01500	KNAG0A07070	KNAG0C05650	NCAS0A12560			CAGL0K02541g	KLLA0F25718g	AGL080C	SAKL0A09768g	KLTH0D07172g
ZYRO0B02288g	TDEL0A03200	Anc_2.544	YKL033W-A		TBLA0G02330		KNAG0A07080	KNAG0C05640		NCAS0A04770	CAGL0L01969g		KLLA0F25696g	AGL081W	SAKL0A09790g	KLTH0D07194g
ZYRO0B02310g	TDEL0A03220	Anc_5.458		YDR381W	TBLA0A06405	TBLA0A02650	KNAG0C04740		NCAS0A11840			CAGL0A03117g	KLLA0E02751g	AFR149C	SAKL0G03080g	KLTH0F15466g
ZYRO0B02332g	TDEL0A03230	Anc_5.459		YDR381C-A		TBLA0A02640	KNAG0C04730		NCAS0A11850			CAGL0A03146g	KLLA0E02773g	AFR148W	SAKL0G03102g	KLTH0F15444g
ZYRO0B02354g	TDEL0A03240	Anc_5.460											KLLA0E02817g	AFR147C	SAKL0G03124g	KLTH0F15422g
ZYRO0G04356g	TDEL0D02440	Anc_5.457	YOR129C		TBLA0A06410	TBLA0A02660		KNAG0B04120		NCAS0H02160			KLLA0E02729g	ACR212C	SAKL0G03058g	KLTH0F15488g
ZYRO0G04378g	TDEL0D02450	Anc_5.456		YDR380W	TBLA0A06420	TBLA0A02670	KNAG0C04790		NCAS0A11830			CAGL0A03102g	KLLA0E02707g	ACR211W	SAKL0G03036g	KLTH0F15510g
Synteny break 7 – ZT like
Z. rouxii	T. delbrueckii	Inferred ancestor	S. cerevisiae		T. blattae		K. naganishii		N. castellii		C. glabrata		K. lactis	E. gossypii	L. kluyveri	L. thermotolerans
ZYRO0G15664g	TDEL0B03500	Anc_8.760	YMR230W	YOR293W		TBLA0D00930	KNAG0J02190	KNAG0G03030	NCAS0C00890	NCAS0B00690	CAGL0M04873g		KLLA0B08173g	AFR569W	SAKL0H04356g	KLTH0D13222g
ZYRO0G15686g	TDEL0B03510	Anc_8.759		YOR292C	TBLA0B03380	TBLA0D00940		KNAG0G03020		NCAS0B00680		CAGL0M11330g	KLLA0B08195g	AFR568C	SAKL0H04378g	KLTH0D13200g
ZYRO0B07766g	TDEL0E01690	Anc_4.205		YLR363C	TBLA0A08260			KNAG0B05890	NCAS0J01240			CAGL0G05005g	KLLA0B08107g		SAKL0H04268g	KLTH0D13288g
ZYRO0B07810g		Anc_4.204	YGR059W		TBLA0A08270		KNAG0D04110			NCAS0A02230	CAGL0K04455g		KLLA0B08129g	AFR571W	SAKL0H04312g
ZYRO0B07832g	TDEL0E01700	Anc_4.203	YGR058W		TBLA0A08280		KNAG0D04100			NCAS0A02220	CAGL0K04433g		KLLA0B08151g	AFR570W	SAKL0H04334g	KLTH0D13244g
ZYRO0B07854g	TDEL0E01710	Anc_4.202		YLR362W	TBLA0A08290			KNAG0B05880	NCAS0J00960			CAGL0B02739g	KLLA0B13112g	ABL011C	SAKL0B05082g	KLTH0E04334g
ZYRO0B07876g	TDEL0E01720	Anc_4.201		YLR361C-A	TBLA0A08300			KNAG0B05870	NCAS0J00950			CAGL0B02755g	KLLA0B13123g	ABL010W	SAKL0B05060g	Kthe_YGOB_Anc_4.201
ZYRO0B07898g	TDEL0E01730	Anc_4.200		YLR361C		TBLA0D02020		KNAG0B05860	NCAS0J01220			CAGL0B02761g	KLLA0B13134g	ABL009W	SAKL0B05038g	KLTH0E10824g
ZYRO0G15620g	TDEL0B03480	Anc_8.762	YMR232W			TBLA0D00920	KNAG0J00760		NCAS0C00870		CAGL0M04917g		KLLA0B13068g	ABL013C	SAKL0B05126g	KLTH0E04290g
ZYRO0G15642g	TDEL0B03490	Anc_8.761	YMR231W		TBLA0B03370		KNAG0J00770		NCAS0C00880		CAGL0M04895g		KLLA0B13090g	ABL012C	SAKL0B05104g	KLTH0E04312g
Synteny break 8 – ZT like
Z. rouxii	T. delbrueckii	Inferred ancestor	S. cerevisiae		T. blattae		K. naganishii		N. castellii		C. glabrata		K. lactis	E. gossypii	L. kluyveri	L. thermotolerans
ZYRO0G21054g	TDEL0D01710	Anc_1.304		YBR282W	TBLA0C02610			KNAG0C01670	NCAS0B07550			CAGL0B03267g	KLLA0F02035g	AFR618C	SAKL0D07282g	KLTH0H11044g
ZYRO0G21076g	TDEL0D01700	Anc_1.303		YBR283C	TBLA0C02600			KNAG0C01660	NCAS0B07560			CAGL0B03245g	KLLA0F02057g	AFR613C	SAKL0D07304g	KLTH0H11066g
ZYRO0B09042g	TDEL0D02100	Anc_1.342		YBR260C	TBLA0F03420	TBLA0D05140		KNAG0C01880	NCAS0B07320		CAGL0I09218g		KLLA0F02123g	AFR616W	SAKL0D07414g	KLTH0H11154g
ZYRO0B09086g	TDEL0D02090	Anc_1.341		YBR261C	TBLA0F03410			KNAG0C01870	NCAS0B07330		CAGL0I09240g		KLLA0F02101g	AFR615W	SAKL0D07348g	KLTH0H11110g
ZYRO0B09108g	TDEL0D02080	Anc_1.340		YBR262C	TBLA0F03400			KNAG0C01860	NCAS0B07340		CAGL0I09262g		KLLA0F02079g	AFR614W	SAKL0D07326g	KLTH0H11088g
ZYRO0B09130g	TDEL0D02070	Anc_1.339		YBR263W	TBLA0F03390			KNAG0C01850	NCAS0B07350		CAGL0I09284g		KLLA0F01210g	AEL188W	SAKL0D06468g	KLTH0H10252g
ZYRO0B09152g	TDEL0D02060	Anc_1.338		YBR264C				KNAG0C01840	NCAS0B07360		CAGL0I09306g		KLLA0F01232g	AEL187C	SAKL0D06490g	KLTH0H10274g
ZYRO0B09174g	TDEL0D02050	Anc_1.337		YBR275C	TBLA0F03380			KNAG0C01830	NCAS0B07370			CAGL0B03399g	KLLA0F01254g	AEL186W	SAKL0D06512g	KLTH0H10296g
ZYRO0B09196g	TDEL0D02040	Anc_1.336		YBR274W				KNAG0C01820	NCAS0B07380		CAGL0I09504g		KLLA0F01276g	AEL185C	SAKL0D06534g	KLTH0H10318g
ZYRO0G21120g	TDEL0D01690	Anc_1.302	YJL070C	YBR284W	TBLA0C02680		KNAG0B05270		NCAS0B07570	NCAS0A09290	CAGL0H02893g			ADR119W	SAKL0D06380g	KLTH0H10208g
ZYRO0G21142g	TDEL0D01680	Anc_1.301	YJL071W		TBLA0C02700		KNAG0B05260			NCAS0A09300	CAGL0H02871g		KLLA0D06523g	ADR120C	SAKL0D06336g	KLTH0H10186g
Synteny break 9 – ZT like
Z. rouxii	T. delbrueckii	Inferred ancestor	S. cerevisiae		T. blattae		K. naganishii		N. castellii		C. glabrata		K. lactis	E. gossypii	L. kluyveri	L. thermotolerans
ZYRO0D15356g	TDEL0H02740	Anc_7.173	YBR252W		TBLA0J01650		KNAG0H02680			NCAS0A12430		CAGL0L09581g	KLLA0D15697g	AGR249C	SAKL0F06974g	KLTH0E05038g
ZYRO0D15378g	TDEL0H02730	Anc_7.174	YBR253W		TBLA0J01640			KNAG0L01080	NCAS0E01990		CAGL0D05368g		KLLA0D15719g	AGR248C	SAKL0F06996g	KLTH0E05016g
ZYRO0C06292g
ZYRO0C06336g	TDEL0F03400	Anc_3.455		YPR122W		TBLA0C05450		KNAG0A07740	NCAS0A11630			CAGL0D04686g	KLLA0D15631g	AGR251C	SAKL0F06886g	KLTH0E05104g
ZYRO0C06358g	TDEL0F03410	Anc_3.456	YGR111W			TBLA0C05440	KNAG0B00940			NCAS0E00870	CAGL0L04708g		KLLA0D15653g	AGR250C	SAKL0F06908g	KLTH0E05082g
ZYRO0C06380g	TDEL0F03420	Anc_3.457	YGR112W			TBLA0C05430	KNAG0B00930			NCAS0E00880	CAGL0L04730g		KLLA0B11451g	AAR028W	SAKL0F03828g	KLTH0F13970g
ZYRO0C06402g	TDEL0F03430	Anc_3.458	YGR113W		TBLA0C03860		KNAG0B00920			NCAS0E00890	CAGL0L04752g		KLLA0B11429g	AAR029W	SAKL0F03806g	KLTH0F13992g
ZYRO0C06424g	TDEL0F03440	Anc_3.459		YPR124W		TBLA0C05420		KNAG0A07730	NCAS0A11640			CAGL0D04708g	KLLA0B11407g	AAR030W	SAKL0F03784g	KLTH0F14014g
ZYRO0D15312g	TDEL0H02760	Anc_7.169			TBLA0J01680				NCAS0E02010		CAGL0D05434g		KLLA0B11495g	AAR026W	SAKL0F03872g	KLTH0F13926g
ZYRO0D15334g	TDEL0H02750	Anc_7.170	YBR251W		TBLA0J01670			KNAG0L01070	NCAS0E02000		CAGL0D05412g		KLLA0B11473g	AAR027W	SAKL0F03850g	KLTH0F13948g
Synteny break 10 – ZT like
Z. rouxii	T. delbrueckii	Inferred ancestor	S. cerevisiae		T. blattae		K. naganishii		N. castellii		C. glabrata		K. lactis	E. gossypii	L. kluyveri	L. thermotolerans
ZYRO0A06512g	TDEL0E02210	Anc_5.403		YHR100C	TBLA0A03550		KNAG0B04340	KNAG0K00160	NCAS0H01920		CAGL0H04389g		KLLA0E16633g	AER392W	SAKL0G07414g	KLTH0E02508g
ZYRO0A06534g	TDEL0E02220	Anc_5.402		YHR099W	TBLA0A03540			KNAG0C05130		NCAS0F03160	CAGL0A01914g		KLLA0F22066g	AER393C	SAKL0G07458g	KLTH0E02530g
ZYRO0C11154g	TDEL0A04930	Anc_5.627		YOR035C		TBLA0J00840	KNAG0B03120		NCAS0G00750		CAGL0I01034g		KLLA0E16699g	AER389C	SAKL0G07348g	KLTH0E02442g
ZYRO0C11176g	TDEL0A04940	Anc_5.628	YDR265W		TBLA0A09640			KNAG0J01560		NCAS0C05290		CAGL0M08690g	KLLA0E16677g	AER390W	SAKL0G07370g	KLTH0E02464g
ZYRO0C11198g	TDEL0A04950	Anc_5.629	YDR266C		TBLA0A09630		KNAG0B03110		NCAS0G00740	NCAS0C05300		CAGL0M08668g	KLLA0E16655g	AER391C	SAKL0G07392g	KLTH0E02486g
ZYRO0C11220g	TDEL0A04960	Anc_5.630		YOR036W	TBLA0A09620		KNAG0B03100		NCAS0G00710		CAGL0I01012g		KLLA0E21759g	ACR092C	SAKL0G01782g	KLTH0F16742g
ZYRO0C11242g	TDEL0A04970	Anc_5.631	YDR267C		TBLA0A09610			KNAG0C06240		NCAS0C05310		CAGL0M08646g	KLLA0E21781g	ACR091W	SAKL0G01760g	KLTH0F16764g
ZYRO0C11264g	TDEL0A04980	Anc_5.632		YOR037W	TBLA0A09600		KNAG0B03090		NCAS0G00700		CAGL0I00990g		KLLA0E21803g	ACR090C	SAKL0G01738g	KLTH0F16786g
ZYRO0A06468g	TDEL0E02190	Anc_5.405	YDR350C		TBLA0A03560			KNAG0C05120		NCAS0F03170		CAGL0A02475g	KLLA0E21715g	ACL103W	SAKL0G01826g	KLTH0F16698g
ZYRO0A06490g	TDEL0E02200	Anc_5.404		YHR101C		TBLA0H01670	KNAG0B04330		NCAS0H01930		CAGL0L11528g		KLLA0E21737g	ACR093C	SAKL0G01804g	KLTH0F16720g
Synteny break 11 – KLE like
Z. rouxii	T. delbrueckii	Inferred ancestor	S. cerevisiae		T. blattae		K. naganishii		N. castellii		C. glabrata		K. lactis	E. gossypii	L. kluyveri	L. thermotolerans
ZYRO0C17842g	TDEL0C05610	Anc_1.140	YCR034W	YJL196C	TBLA0J01230	TBLA0C06030	KNAG0C00860		NCAS0I03130	NCAS0B08500	CAGL0K00583g	CAGL0L08184g	KLLA0C03542g	AFR624W	SAKL0C04312g	KLTH0F03740g
ZYRO0C17864g	TDEL0C05620	Anc_1.139	YCR035C		TBLA0J01240	TBLA0C06020	KNAG0C00850			NCAS0B08510		CAGL0L08206g	KLLA0C03520g	AFR625C	SAKL0C04290g	KLTH0F03718g
ZYRO0C12210g	TDEL0F03040	Anc_1.143		YJL193W		TBLA0D03090		KNAG0C02210	NCAS0I03100		CAGL0K00627g		KLLA0B07689g		SAKL0C04400g
ZYRO0C12232g	TDEL0F03050	Anc_1.142		YJL194W		TBLA0D03100		KNAG0C02200	NCAS0I03110		CAGL0K00605g		KLLA0C03586g	AFR621C	SAKL0C04378g	KLTH0F03784g
ZYRO0C12254g	TDEL0F03060	Anc_1.141	YCR033W		TBLA0J01220		KNAG0C00870	KNAG0C02190	NCAS0I03120	NCAS0B08490		CAGL0L08162g	KLLA0C03564g	AFR623W	SAKL0C04334g	KLTH0F03762g
ZYRO0C12276g	TDEL0F03070	Anc_3.425	YGR089W		TBLA0C02340		KNAG0B01160		NCAS0E01180		CAGL0G02959g		KLLA0D14707g	ADR028W	SAKL0F05918g	KLTH0F12144g
ZYRO0C12320g	TDEL0F03080	Anc_3.426	YGR090W			TBLA0F01710	KNAG0B01150		NCAS0E01170		CAGL0G03003g		KLLA0D14806g	ADR029W	SAKL0F05984g	KLTH0F12100g
ZYRO0C12342g	TDEL0F03090	Anc_3.427		YPR109W	TBLA0C02330			KNAG0A07590		NCAS0A11510		CAGL0B04103g	KLLA0D14828g	ADR030W	SAKL0F06006g	KLTH0F12078g
ZYRO0C17798g	TDEL0C05590	Anc_3.423		YPR108W	TBLA0C02350			KNAG0A07580		NCAS0A11490		CAGL0G01672g	KLLA0D14663g	ADR027W	SAKL0F05720g	KLTH0F12232g
ZYRO0C17820g	TDEL0C05600	Anc_3.424	YGR088W						NCAS0E01190				KLLA0D14685g		SAKL0F05742g	KLTH0F12210g
Synteny break 12 – KLE like
Z. rouxii	T. delbrueckii	Inferred ancestor	S. cerevisiae		T. blattae		K. naganishii		N. castellii		C. glabrata		K. lactis	E. gossypii	L. kluyveri	L. thermotolerans
ZYRO0E02134g	TDEL0F01440	Anc_2.191		YOR093C		TBLA0B01490	KNAG0H03290		NCAS0B06750		CAGL0L03718g		KLLA0C13585g	ACL079C	SAKL0E10032g	KLTH0G08096g
ZYRO0E02156g	TDEL0F01450	Anc_2.192	YNL095C	YOR092W	TBLA0B01790	TBLA0B01500	KNAG0H03280		NCAS0B06740	NCAS0G02690	CAGL0L03696g	CAGL0G06468g	KLLA0C13607g	ACL080W	SAKL0E10010g	KLTH0G08118g
ZYRO0C15576g	TDEL0C04670	Anc_2.195		YOR090C	TBLA0B01830		KNAG0I01070		NCAS0B06730			CAGL0J08657g	KLLA0C13706g	ACL083C	SAKL0E09944g	KLTH0G08184g
ZYRO0C15598g	TDEL0C04680	Anc_2.194		YOR091W		TBLA0B01520	KNAG0I01060			NCAS0G02710		CAGL0J08679g	KLLA0C13673g	ACL082W	SAKL0E09966g	KLTH0G08162g
ZYRO0C15620g	TDEL0C04690	Anc_2.193	YNL094W			TBLA0B01510		KNAG0M01860		NCAS0G02700	CAGL0K09878g		KLLA0C13651g	ACL081C	SAKL0E09988g	KLTH0G08140g
ZYRO0C15642g	TDEL0C04700	Anc_3.328		YPR047W	TBLA0B02600			KNAG0H00830	NCAS0A10980		CAGL0H08602g		KLLA0B12177g	ADL305C	SAKL0B07018g	KLTH0E14740g
ZYRO0C15664g	TDEL0C04710	Anc_3.329		YPR048W	TBLA0B02590		KNAG0J02450			NCAS0I01280	CAGL0H08580g		KLLA0B12155g	ADL306C	SAKL0B07040g	KLTH0E14762g
ZYRO0C15686g	TDEL0C04720	Anc_3.330		YPR049C	TBLA0B02580			KNAG0H00820	NCAS0A10990		CAGL0H08558g		KLLA0B12133g	ADL307W	SAKL0B07062g	KLTH0E14784g
ZYRO0F12914g	TDEL0F01470	Anc_3.326	YBR087W		TBLA0B02620			KNAG0H00850	NCAS0A10960		CAGL0D01738g		KLLA0B12221g	ADL303C	SAKL0B06974g	KLTH0E14696g
ZYRO0F12936g	TDEL0F01460	Anc_3.327	YBL038W		TBLA0B02610			KNAG0H00840	NCAS0A10970			CAGL0F04411g	KLLA0B12199g	ADL304W	SAKL0B06996g	KLTH0E14718g
Synteny break 13 – ZT like
Z. rouxii	T. delbrueckii	Inferred ancestor	S. cerevisiae		T. blattae		K. naganishii		N. castellii		C. glabrata		K. lactis	E. gossypii	L. kluyveri	L. thermotolerans
ZYRO0G01408g	TDEL0H03440	Anc_7.107	YAL008W			TBLA0E02130	KNAG0D04700			NCAS0F01780		CAGL0C02739g	KLLA0F08107g	AEL332W	SAKL0B09394g	KLTH0D02926g
ZYRO0G01430g	TDEL0H03450	Anc_7.106		YOR014W	TBLA0A04800	TBLA0E02140		KNAG0L00650	NCAS0I00590		CAGL0F01397g		KLLA0F08085g	AEL333W	SAKL0B09416g	KLTH0D02904g
ZYRO0C17732g	TDEL0C05560	Anc_3.419		YPR105C		TBLA0F01750		KNAG0A07540	NCAS0A11460			CAGL0G01760g	KLLA0F08184g	AEL328W	SAKL0B09306g	KLTH0D03014g
ZYRO0C17754g	TDEL0C05570	Anc_3.420	YGR086C		TBLA0C02370	TBLA0F01740	KNAG0B01170	KNAG0A07550	NCAS0A11470	NCAS0E01200	CAGL0G02915g	CAGL0G01738g	KLLA0F08162g	AEL329W	SAKL0B09328g	KLTH0D02992g
ZYRO0C17776g	TDEL0C05580	Anc_3.422		YPR107C	TBLA0C02360			KNAG0A07570	NCAS0A11480			CAGL0G01694g	KLLA0F08129g	AEL331W	SAKL0B09372g	KLTH0D02948g
ZYRO0C17798g	TDEL0C05590	Anc_3.423		YPR108W	TBLA0C02350			KNAG0A07580	NCAS0A11490			CAGL0G01672g	KLLA0D14663g	ADR027W	SAKL0F05720g	KLTH0F12232g
ZYRO0C17820g	TDEL0C05600	Anc_3.424	YGR088W							NCAS0E01190			KLLA0D14685g		SAKL0F05742g	KLTH0F12210g
ZYRO0G01364g	TDEL0H03420	Anc_7.109	YHL022C		TBLA0A04820		KNAG0D04680			NCAS0F01490		CAGL0C02783g	KLLA0D14575g	ADR025W	SAKL0F05632g	KLTH0F12320g
ZYRO0G01386g	TDEL0H03430	Anc_7.108	YAL007C	YOR016C	TBLA0A04810	TBLA0E02120	KNAG0D04690		NCAS0I00600	NCAS0F01770		CAGL0C02761g	KLLA0D14641g	ADR026W	SAKL0F05698g	KLTH0F12254g
Synteny break 14 – KLE like
Z. rouxii	T. delbrueckii	Inferred ancestor	S. cerevisiae		T. blattae		K. naganishii		N. castellii		C. glabrata		K. lactis	E. gossypii	L. kluyveri	L. thermotolerans
ZYRO0C12276g	TDEL0F03070	Anc_3.425	YGR089W		TBLA0C02340		KNAG0B01160			NCAS0E01180	CAGL0G02959g		KLLA0D14707g	ADR028W	SAKL0F05918g	KLTH0F12144g
ZYRO0C12320g	TDEL0F03080	Anc_3.426	YGR090W			TBLA0F01710	KNAG0B01150			NCAS0E01170	CAGL0G03003g		KLLA0D14806g	ADR029W	SAKL0F05984g	KLTH0F12100g
ZYRO0C17798g	TDEL0C05590	Anc_3.423		YPR108W	TBLA0C02350			KNAG0A07580	NCAS0A11490			CAGL0G01672g	KLLA0D14663g	ADR027W	SAKL0F05720g	KLTH0F12232g
ZYRO0C17820g	TDEL0C05600	Anc_3.424	YGR088W							NCAS0E01190			KLLA0D14685g		SAKL0F05742g	KLTH0F12210g
ZYRO0C17842g	TDEL0C05610	Anc_1.140	YCR034W	YJL196C	TBLA0J01230	TBLA0C06030	KNAG0C00860		NCAS0I03130	NCAS0B08500	CAGL0K00583g	CAGL0L08184g	KLLA0C03542g	AFR624W	SAKL0C04312g	KLTH0F03740g
ZYRO0C17864g	TDEL0C05620	Anc_1.139	YCR035C		TBLA0J01240	TBLA0C06020	KNAG0C00850			NCAS0B08510		CAGL0L08206g	KLLA0C03520g	AFR625C	SAKL0C04290g	KLTH0F03718g
ZYRO0C17886g	TDEL0C05630	Anc_1.138	YCR036W		TBLA0J00610		KNAG0C00840			NCAS0B08520		CAGL0L08228g	KLLA0C03498g	AFR626W	SAKL0C04268g	KLTH0F03696g
ZYRO0C12232g	TDEL0F03050	Anc_1.142		YJL194W		TBLA0D03100		KNAG0C02200	NCAS0I03110		CAGL0K00605g		KLLA0C03586g	AFR621C	SAKL0C04378g	KLTH0F03784g
ZYRO0C12254g	TDEL0F03060	Anc_1.141	YCR033W		TBLA0J01220		KNAG0C00870	KNAG0C02190	NCAS0I03120	NCAS0B08490		CAGL0L08162g	KLLA0C03564g	AFR623W	SAKL0C04334g	KLTH0F03762g
Synteny break 15 – KLE like
Z. rouxii	T. delbrueckii	Inferred ancestor	S. cerevisiae		T. blattae		K. naganishii		N. castellii		C. glabrata		K. lactis	E. gossypii	L. kluyveri	L. thermotolerans
ZYRO0G18106g	TDEL0C03560	Anc_7.493		YBL050W	TBLA0F02790		KNAG0F03670			NCAS0C00530	CAGL0F04653g		KLLA0E05919g	ABR155C	SAKL0F14696g	KLTH0E01518g
ZYRO0G18128g	TDEL0C03570	Anc_7.494	YJR109C		TBLA0F02800			KNAG0D01210	NCAS0H00410			CAGL0C04917g	KLLA0F03190g	ABR157W	SAKL0F14652g	KLTH0E01452g
ZYRO0D01980g		Anc_7.497	YJR107W			TBLA0J00330		KNAG0D01190	NCAS0H00390			CAGL0C04939g	KLLA0D10934g	ABR159C	SAKL0F14586g	KLTH0E01386g
ZYRO0D02002g	TDEL0H00740	Anc_7.496		YER020W		TBLA0J00340	KNAG0F03680			NCAS0A14970	CAGL0I08195g		KLLA0D10956g	ABR158W	SAKL0F14608g	KLTH0E01408g
Zrou_YGOB_Anc_7.495	TDEL0H00750	Anc_7.495	Scer_YGOB_Anc_7.495		TBLA0F02810			KNAG0D01200	NCAS0H00400			CAGL0C04933g	KLLA0F03179g	Agos_YGOB_Anc_7.495	SAKL0F14630g	KLTH0E01430g
ZYRO0D02024g	TDEL0H00760	Anc_1.196		YKR065C		TBLA0C05920	KNAG0C01150			NCAS0B08210	CAGL0M05929g		KLLA0A06083g	ADR328W	SAKL0C05808g	KLTH0F05192g
ZYRO0D02046g	TDEL0H00770	Anc_1.197	YJL151C					KNAG0C02530	NCAS0J00940						SAKL0C05830g	KLTH0F05214g
ZYRO0D02068g	TDEL0H00780	Anc_1.198	YJL149W			TBLA0C05930		KNAG0C02540	NCAS0I02740			CAGL0I06028g	KLLA0A06061g	ACR240W	SAKL0C05896g	KLTH0F05236g
ZYRO0G18172g	TDEL0C03590	Anc_1.194		YKR066C		TBLA0C05910	KNAG0C01140			NCAS0B08220	CAGL0K08184g		KLLA0B07557g		SAKL0C05786g	KLTH0F05170g
ZYRO0G18194g	TDEL0C03600	Anc_1.193	YJL154C		TBLA0A06270	TBLA0C05900	KNAG0C01130		NCAS0I02760	NCAS0B08230		CAGL0I06072g	KLLA0B07535g	AEL107W	SAKL0C05764g	KLTH0F05148g
Synteny break 16 – ZT like
Z. rouxii	T. delbrueckii	Inferred ancestor	S. cerevisiae		T. blattae		K. naganishii		N. castellii		C. glabrata		K. lactis	E. gossypii	L. kluyveri	L. thermotolerans
ZYRO0B00638g	TDEL0F01550	Anc_4.42	YLL019C		TBLA0B10030			KNAG0I03000		NCAS0A06000		CAGL0D06600g	KLLA0F22297g	ADL043C	SAKL0H24288g	KLTH0E07128g
ZYRO0B00682g	TDEL0F01560	Anc_4.41		YLR312C			KNAG0J02760		NCAS0C05720					ADL044W	SAKL0H24310g	KLTH0E07106g
ZYRO0E02486g	TDEL0F01070	Anc_8.126		YGL173C	TBLA0G02750			KNAG0G01190		NCAS0C04170		CAGL0L05874g	KLLA0F22385g	ADL046C	SAKL0H24376g	KLTH0E07062g
ZYRO0E02508g	TDEL0F01080	Anc_8.125		YGL172W	TBLA0G02740			KNAG0G01180		NCAS0C04180		CAGL0L05852g	KLLA0F22363g	ADL045W	SAKL0H24354g	KLTH0E07084g
ZYRO0E02530g	TDEL0F01090	Anc_8.124		YGL171W	TBLA0C00640		KNAG0D02250		NCAS0B04630		CAGL0K02387g		KLLA0C17424g	ADL024C	SAKL0H20218g	KLTH0H08646g
ZYRO0E02552g	TDEL0F01100	Anc_8.123	YPR020W		TBLA0C00650			KNAG0G01170		NCAS0C04190	CAGL0K02409g		KLLA0C17446g	ADL025W	SAKL0H20240g	KLTH0H08668g
ZYRO0E02574g	TDEL0F01110	Anc_8.122	YPR019W			TBLA0E03960		KNAG0G01160		NCAS0C04200	CAGL0K02431g		KLLA0C17512g	ADL026W	SAKL0H20284g	KLTH0H08690g
ZYRO0B00704g	TDEL0F01570	Anc_4.40		YLR312W-A	TBLA0B10040		KNAG0J02770		NCAS0C05730		CAGL0E03520g		KLLA0C17402g	ADL023W	SAKL0H20196g	KLTH0H08624g
ZYRO0B00726g	TDEL0F01580	Anc_4.39	YLL021W	YLR313C	TBLA0B10050		KNAG0J02780	KNAG0I03010	NCAS0C05740	NCAS0A06010	CAGL0E03542g	CAGL0D06622g	KLLA0C17380g	ADL022C	SAKL0H20174g	KLTH0H08602g
Synteny break 17 – ZT like
Z. rouxii	T. delbrueckii	Inferred ancestor	S. cerevisiae		T. blattae		K. naganishii		N. castellii		C. glabrata		K. lactis	E. gossypii	L. kluyveri	L. thermotolerans
ZYRO0A12034g	TDEL0D02940	Anc_4.157	YGR020C		TBLA0G00580		KNAG0D03820		NCAS0A01930			CAGL0D04048g	KLLA0D04400g	AGL052W	SAKL0H20570g	KLTH0H08932g
ZYRO0A12056g	TDEL0D02930	Anc_4.158	YGR021W		TBLA0G00590		KNAG0D03830		NCAS0A01940			CAGL0D04070g	KLLA0D04378g	AGL053C	SAKL0H20548g	KLTH0H08910g
ZYRO0E02728g	TDEL0B05500	Anc_8.115	YPR011C				KNAG0D02300					CAGL0J01661g	Klac_YGOB_Anc_8.115	AGL047C	SAKL0H20482g	KLTH0H08844g
ZYRO0E02750g	TDEL0B05490	Anc_8.114	YPR010C-A			TBLA0E03920	KNAG0D02310		NCAS0B04680			CAGL0J01699g	KLLA0D04334g		SAKL0H20504g	KLTH0H08866g
ZYRO0E02772g	TDEL0B05480												KLLA0D04356g		SAKL0H20526g	KLTH0H08888g
ZYRO0E02838g	TDEL0B05470	Anc_8.113	YPR010C			TBLA0E03910	KNAG0D02320			NCAS0C04240		CAGL0J01848g	KLLA0B06303g	ABR029W	SAKL0B03542g	KLTH0G17160g
ZYRO0E02860g	TDEL0B05460	Anc_8.112		YGL167C	TBLA0C00190			KNAG0E03400		NCAS0C04250	CAGL0I04312g	CAGL0J01870g	KLLA0A03157g	AEL301W	SAKL0B03520g	KLTH0G17138g
ZYRO0E02882g	TDEL0B05450	Anc_8.111		YGL169W		TBLA0E03900		KNAG0E03410		NCAS0C04260	CAGL0I04290g		KLLA0A03135g	AEL300C	SAKL0B03498g	KLTH0G17116g
ZYRO0E02926g	TDEL0B05440
ZYRO0A12100g	TDEL0D02920	Anc_4.159	YGR023W	YLR332W	TBLA0G00600	TBLA0G01230	KNAG0D03840	KNAG0B05490	NCAS0A01950	NCAS0J00870	CAGL0G00858g	CAGL0J00253g	KLLA0A03179g	AEL302W	SAKL0B03608g	KLTH0G17226g
ZYRO0A12144g	TDEL0D02910	Anc_4.161	YGR024C		TBLA0G01180		KNAG0D03850		NCAS0A01970			CAGL0J00209g	KLLA0B06237g	ABR031C	SAKL0B03696g	KLTH0G17270g
Synteny break 18 – KLE like
Z. rouxii	T. delbrueckii	Inferred ancestor	S. cerevisiae		T. blattae		K. naganishii		N. castellii		C. glabrata		K. lactis	E. gossypii	L. kluyveri	L. thermotolerans
ZYRO0F04928g	TDEL0C01380	Anc_8.109	YPR009W	YGL162W	TBLA0C00140	TBLA0F03550	KNAG0D02330	KNAG0E03440	NCAS0B05740	NCAS0C04280	CAGL0I04246g	CAGL0L09383g	KLLA0A03091g	AEL298C	SAKL0B03432g	KLTH0G17050g
ZYRO0F04950g	TDEL0C01390	Anc_8.110		YGL161C	TBLA0C00130			KNAG0E03430		NCAS0C04270	CAGL0I04268g		KLLA0A03113g	AEL299W	SAKL0B03454g	KLTH0G17072g
ZYRO0E02860g	TDEL0B05460	Anc_8.112		YGL167C	TBLA0C00190			KNAG0E03400		NCAS0C04250	CAGL0I04312g	CAGL0J01870g	KLLA0A03157g	AEL301W	SAKL0B03520g	KLTH0G17138g
ZYRO0E02882g	TDEL0B05450	Anc_8.111		YGL169W		TBLA0E03900		KNAG0E03410		NCAS0C04260	CAGL0I04290g		KLLA0A03135g	AEL300C	SAKL0B03498g	KLTH0G17116g
ZYRO0E02926g	TDEL0B05440
ZYRO0E02948g	TDEL0B05430	Anc_1.470		YJR043C	TBLA0C01680		KNAG0I00360			NCAS0A08310	CAGL0I03256g		KLLA0E22419g	AEL075W	SAKL0D11440g	KLTH0H14520g
ZYRO0E02970g	TDEL0B05420	Anc_1.469	YEL027W		TBLA0C01670		KNAG0I00370	KNAG0G00620		NCAS0A08320		CAGL0I01562g	KLLA0E22441g	AEL074W	SAKL0D11418g	KLTH0H14498g
ZYRO0E02992g	TDEL0B05410	Anc_1.468		YJR042W	TBLA0C01660			KNAG0G00610	NCAS0G04030			CAGL0I01584g	KLLA0E22463g	AEL073C	SAKL0D11396g	KLTH0H14476g
ZYRO0F04994g	TDEL0C01400	Anc_1.471	YEL029C		TBLA0C01690			KNAG0G00560	NCAS0G04040		CAGL0I03300g		KLLA0E22375g	AEL076C	SAKL0D11506g	KLTH0H14586g
Synteny break 19 – ZT like
Z. rouxii	T. delbrueckii	Inferred ancestor	S. cerevisiae		T. blattae		K. naganishii		N. castellii		C. glabrata		K. lactis	E. gossypii	L. kluyveri	L. thermotolerans
ZYRO0G01034g	TDEL0D02320	Anc_1.362		YOL025W		TBLA0A10520		KNAG0I01630		NCAS0A08950	CAGL0A02024g		KLLA0A10989g		SAKL0D10340g	KLTH0H13618g
ZYRO0G01056g	TDEL0D02330	Anc_1.363	YFR017C	YOL024W	TBLA0D05100	TBLA0C01550	KNAG0C01970		NCAS0D00570		CAGL0A02002g	CAGL0K10428g	KLLA0A10967g	AEL036W
ZYRO0E04026g	TDEL0B05730
ZYRO0E04048g	TDEL0B05740	Anc_1.429		YCR014C		TBLA0D04370	KNAG0I00510			NCAS0A08550		CAGL0L07700g	KLLA0A11033g	AEL039W		KLTH0H13662g
ZYRO0E04070g	TDEL0B05750	Anc_1.428		YCR012W		TBLA0D04360	KNAG0I00520	KNAG0H01820	NCAS0G03180	NCAS0A08560		CAGL0L07722g	KLLA0A11011g	AEL038C	SAKL0D10384g	KLTH0H13640g
ZYRO0E04092g	TDEL0B05760	Anc_1.427		YCR011C		TBLA0D04350	KNAG0I00530			NCAS0A08570		CAGL0L07744g	KLLA0D04554g	AER190W	SAKL0D09394g	KLTH0H12760g
ZYRO0E04114g	TDEL0B05770	Anc_1.426	YNR003C		TBLA0C01070		KNAG0I00540			NCAS0A08580	CAGL0M03487g		KLLA0D04532g	AER191W	SAKL0D09372g	KLTH0H12738g
ZYRO0E04136g
ZYRO0G00990g	TDEL0D02300	Anc_1.360	YFR019W			TBLA0A10150	KNAG0C01990		NCAS0D00550			CAGL0K10384g	KLLA0D04598g	AER188C	SAKL0D09438g	KLTH0H12804g
ZYRO0G01012g	TDEL0D02310	Anc_1.361	YFR018C			TBLA0A10160	KNAG0C01980		NCAS0D00560			CAGL0K10406g	KLLA0D04576g	AER189W	SAKL0D09416g	KLTH0H12782g
Synteny break 20 – KLE like
Z. rouxii	T. delbrueckii	Inferred ancestor	S. cerevisiae		T. blattae		K. naganishii		N. castellii		C. glabrata		K. lactis	E. gossypii	L. kluyveri	L. thermotolerans
ZYRO0B08910g	TDEL0D02160	Anc_1.348		YFR029W				KNAG0C01920	NCAS0B07290		CAGL0I09130g		KLLA0F02255g	AFR608W	SAKL0D07568g	KLTH0H11286g
ZYRO0B08932g	TDEL0D02150	Anc_1.347	YJL046W		TBLA0F03450		KNAG0E02710			NCAS0A09050		CAGL0J04840g	KLLA0F02233g	AFR609C	SAKL0D07546g	KLTH0H11264g
ZYRO0E05566g	TDEL0B06310	Anc_1.375	YFR015C	YLR258W		TBLA0D05020	KNAG0I01470	KNAG0C02100	NCAS0D00640	NCAS0A08870	CAGL0F04719g	CAGL0K10626g	KLLA0F23133g	AAR008W	SAKL0D07678g	KLTH0H11418g
ZYRO0E05588g	TDEL0B06320	Anc_1.374	YFR014C	YOL016C		TBLA0D05010	KNAG0I01480	KNAG0C02080	NCAS0D00630	NCAS0A08880	CAGL0F04741g	CAGL0K10604g	KLLA0F23155g	AAR009W	SAKL0D07656g	KLTH0H11396g
ZYRO0E05610g	TDEL0B06330	Anc_1.373	YFR013W	YOL017W	TBLA0C01170	TBLA0D05000	KNAG0I01490	KNAG0C02070	NCAS0D00620	NCAS0A08890	CAGL0F04763g	CAGL0K10582g	KLLA0F23199g	AFR606C	SAKL0D07612g	KLTH0H11330g
ZYRO0E05632g	TDEL0B06340	Anc_2.545	YKL034W			TBLA0I01490		KNAG0A07090		NCAS0A04760	CAGL0L01947g		KLLA0F25674g	AFR275W	SAKL0A09812g	KLTH0D07216g
ZYRO0E05654g	TDEL0B06350	Anc_2.546	YKL035W	YHL012W	TBLA0G02340	TBLA0I01540	KNAG0C05630		NCAS0A12570		CAGL0L01925g		KLLA0F25652g	AGL082W	SAKL0A09834g	KLTH0D07238g
ZYRO0E05676g	TDEL0B06360	Anc_2.547	YKL038W	YBR033W	TBLA0G02350		KNAG0C05620	KNAG0A07100	NCAS0A12580	NCAS0A04750	CAGL0L01903g		KLLA0F25630g	AGL083W	SAKL0A09856g	KLTH0D07260g
ZYRO0B02266g	TDEL0A03190	Anc_2.543		YHL011C	TBLA0G02320	TBLA0I01500	KNAG0C05650	KNAG0A07070	NCAS0A12560			CAGL0K02541g	KLLA0F25718g	AGL080C	SAKL0A09768g	KLTH0D07172g
ZYRO0B02288g	TDEL0A03200	Anc_2.544	YKL033W-A		TBLA0G02330		KNAG0C05640	KNAG0A07080		NCAS0A04770	CAGL0L01969g		KLLA0F25696g	AGL081W	SAKL0A09790g	KLTH0D07194g
Synteny break 21 – KLE like
Z. rouxii	T. delbrueckii	Inferred ancestor	S. cerevisiae		T. blattae		K. naganishii		N. castellii		C. glabrata		K. lactis	E. gossypii	L. kluyveri	L. thermotolerans
ZYRO0E02860g	TDEL0B05460	Anc_8.112	YGL167C		TBLA0C00190			KNAG0E03400		NCAS0C04250	CAGL0I04312g	CAGL0J01870g	KLLA0A03157g	AEL301W	SAKL0B03520g	KLTH0G17138g
ZYRO0E02882g	TDEL0B05450	Anc_8.111	YGL169W			TBLA0E03900		KNAG0E03410		NCAS0C04260	CAGL0I04290g		KLLA0A03135g	AEL300C	SAKL0B03498g	KLTH0G17116g
ZYRO0F04906g	TDEL0C01370	Anc_8.108	YGL163C			TBLA0B08040		KNAG0E03460	NCAS0A05110		CAGL0I04224g		KLLA0A03069g	AEL297W	SAKL0B03388g	KLTH0G17028g
ZYRO0F04928g	TDEL0C01380	Anc_8.109	YGL162W	YPR009W	TBLA0C00140	TBLA0F03550	KNAG0D02330	KNAG0E03440	NCAS0B05740	NCAS0C04280	CAGL0I04246g	CAGL0L09383g	KLLA0A03091g	AEL298C	SAKL0B03432g	KLTH0G17050g
ZYRO0F04950g	TDEL0C01390	Anc_8.110	YGL161C		TBLA0C00130			KNAG0E03430		NCAS0C04270	CAGL0I04268g		KLLA0A03113g	AEL299W	SAKL0B03454g	KLTH0G17072g
ZYRO0F04994g	TDEL0C01400	Anc_1.471	YEL029C			TBLA0C01690	KNAG0G00560		NCAS0G04040		CAGL0I03300g		KLLA0E22375g	AEL076C	SAKL0D11506g	KLTH0H14586g
ZYRO0F05016g	TDEL0C01410	Anc_1.473		YJR044C		TBLA0C01700		KNAG0I00350		NCAS0A08250		CAGL0I01518g	KLLA0E22331g	AFR351C	SAKL0D11616g	KLTH0F07018g
ZYRO0F05038g	TDEL0C01420	Anc_1.474	YEL030W	YJR045C	TBLA0B02210			KNAG0I00340		NCAS0A08260	CAGL0I03322g	CAGL0I01496g	KLLA0E22309g	AFR352C	SAKL0D11638g	KLTH0F06996g
ZYRO0E02948g	TDEL0B05430	Anc_1.470		YJR043C		TBLA0C01680		KNAG0I00360		NCAS0A08310	CAGL0I03256g		KLLA0E22419g	AEL075W	SAKL0D11440g	KLTH0H14520g
ZYRO0E02970g	TDEL0B05420	Anc_1.469	YEL027W			TBLA0C01670	KNAG0G00620	KNAG0I00370		NCAS0A08320		CAGL0I01562g	KLLA0E22441g	AEL074W	SAKL0D11418g	KLTH0H14498g
Synteny break 22 – KLE like
Z. rouxii	T. delbrueckii	Inferred ancestor	S. cerevisiae		T. blattae		K. naganishii		N. castellii		C. glabrata		K. lactis	E. gossypii	L. kluyveri	L. thermotolerans
ZYRO0C09548g	TDEL0H01430	Anc_1.492		YJR052W	TBLA0B02100			KNAG0B00320		NCAS0A13050	CAGL0D06006g		KLLA0A07997g	ACL088C	SAKL0D12188g	KLTH0C03036g
ZYRO0F05522g	TDEL0C02490	Anc_1.490	YEL047C	YJR051W	TBLA0B02110	TBLA0D03810	KNAG0G00400	KNAG0B00330	NCAS0G04200	NCAS0A13040	CAGL0L01177g	CAGL0I01320g	KLLA0F16753g	AFR367W	SAKL0D12056g	KLTH0C03146g
ZYRO0F05544g	TDEL0C02480	Anc_1.491	YEL048C			TBLA0D03800	KNAG0G00390		NCAS0G04210		CAGL0L01155g		KLLA0F16731g	AFR385W	SAKL0D12122g	KLTH0C03124g
ZYRO0F05566g	TDEL0C02470												KLLA0F16709g	AFR386C	SAKL0D12100g	KLTH0C03102g
ZYRO0F05588g	TDEL0C02460	Anc_7.301		YDL186W	TBLA0F02050		KNAG0B02860		NCAS0E03670			CAGL0J09174g	KLLA0F05379g	ADR101W	SAKL0F10142g	KLTH0H02376g
ZYRO0F05610g	TDEL0C02450	Anc_7.302	YDL134C	YDL188C	TBLA0F02060	TBLA0A05910		KNAG0C04030	NCAS0E03680	NCAS0A13850	CAGL0I03938g		KLLA0F05357g	ADR099C	SAKL0F10164g	KLTH0H02354g
ZYRO0F05632g	TDEL0C02440												KLLA0F05335g		SAKL0F10186g	KLTH0H02332g
Zrou_YGOB_Anc_7.299	TDEL0H01450	Anc_7.299	YDL133C-A	YDL184C					NCAS0E03660	NCAS0A13830	Cgla_YGOB_Anc_7.299		Klac_YGOB_Anc_7.299	ADR103C	Sklu_YGOB_Anc_7.299	Kthe_YGOB_Anc_7.299
ZYRO0C09504g	TDEL0H01420	Anc_7.300		YDL185W		TBLA0D04500		KNAG0C04050		NCAS0A13840	CAGL0I03960g		KLLA0F05401g	ADR102W	SAKL0F10120g	KLTH0H02398g
Synteny break 23 – ZT like
Z. rouxii	T. delbrueckii	Inferred ancestor	S. cerevisiae		T. blattae		K. naganishii		N. castellii		C. glabrata		K. lactis	E. gossypii	L. kluyveri	L. thermotolerans
ZYRO0C17798g	TDEL0C05590	Anc_3.423		YPR108W	TBLA0C02350			KNAG0A07580	NCAS0A11490			CAGL0G01672g	KLLA0D14663g	ADR027W	SAKL0F05720g	KLTH0F12232g
ZYRO0C17820g	TDEL0C05600	Anc_3.424	YGR088W							NCAS0E01190			KLLA0D14685g		SAKL0F05742g	KLTH0F12210g
ZYRO0G01342g	TDEL0H03410	Anc_7.110	YHL021C				KNAG0D04670					CAGL0K08844g	KLLA0D14553g	ADR024W	SAKL0F05610g	KLTH0F12342g
ZYRO0G01364g	TDEL0H03420	Anc_7.109	YHL022C		TBLA0A04820		KNAG0D04680			NCAS0F01490		CAGL0C02783g	KLLA0D14575g	ADR025W	SAKL0F05632g	KLTH0F12320g
ZYRO0G01386g	TDEL0H03430	Anc_7.108	YAL007C	YOR016C	TBLA0A04810	TBLA0E02120	KNAG0D04690		NCAS0I00600	NCAS0F01770		CAGL0C02761g	KLLA0D14641g	ADR026W	SAKL0F05698g	KLTH0F12254g
ZYRO0G01408g	TDEL0H03440	Anc_7.107	YAL008W			TBLA0E02130	KNAG0D04700			NCAS0F01780		CAGL0C02739g	KLLA0F08107g	AEL332W	SAKL0B09394g	KLTH0D02926g
ZYRO0G01430g	TDEL0H03450	Anc_7.106		YOR014W	TBLA0A04800	TBLA0E02140		KNAG0L00650	NCAS0I00590		CAGL0F01397g		KLLA0F08085g	AEL333W	SAKL0B09416g	KLTH0D02904g
ZYRO0G01452g		Anc_7.105		YOR012W	TBLA0A04790			KNAG0L00640	NCAS0I00580				KLLA0C16511g		SAKL0F11176g	KLTH0H01650g
ZYRO0C17754g	TDEL0C05570	Anc_3.420	YGR086C		TBLA0C02370	TBLA0F01740	KNAG0B01170	KNAG0A07550	NCAS0A11470	NCAS0E01200	CAGL0G02915g	CAGL0G01738g	KLLA0F08162g	AEL329W	SAKL0B09328g	KLTH0D02992g
ZYRO0C17776g	TDEL0C05580	Anc_3.422		YPR107C	TBLA0C02360			KNAG0A07570	NCAS0A11480			CAGL0G01694g	KLLA0F08129g	AEL331W	SAKL0B09372g	KLTH0D02948g
Synteny break 24 – KLE like
Z. rouxii	T. delbrueckii	Inferred ancestor	S. cerevisiae		T. blattae		K. naganishii		N. castellii		C. glabrata		K. lactis	E. gossypii	L. kluyveri	L. thermotolerans
ZYRO0G08052g	TDEL0G01660	Anc_6.179		YGL093W	TBLA0A01880	TBLA0B05230		KNAG0F02180		NCAS0D03610		CAGL0H03047g	KLLA0E18943g	AFL058C	SAKL0A05368g	KLTH0H04994g
ZYRO0G08074g	TDEL0G01650	Anc_6.180		YGL092W				KNAG0F02170		NCAS0D03620		CAGL0H03069g	KLLA0E18965g	AFL059C	SAKL0A05346g	KLTH0H04972g
ZYRO0G03564g	TDEL0F01750	Anc_6.176		YGL094C		TBLA0B05250		KNAG0F02190		NCAS0D03600		CAGL0H03025g	KLLA0E18877g	AFL055W	SAKL0A05434g	KLTH0H05060g
ZYRO0G03586g	TDEL0F01740	Anc_6.177	YPL183C		TBLA0A01870		KNAG0M00450		NCAS0H01060		CAGL0C01441g		KLLA0E18899g	AFL056C	SAKL0A05412g	KLTH0H05038g
Zrou_YGOB_Anc_6.178	TDEL0F01730	Anc_6.178	YPL183W-A			TBLA0B05240	KNAG0M00440		NCAS0H01050		CAGL0C01435g		KLLA0E18921g	AFL057W	SAKL0A05390g	KLTH0H05016g
ZYRO0G03608g	TDEL0F01720	Anc_4.25		YLL033W	TBLA0A08480			KNAG0E01020		NCAS0A02930		CAGL0D02860g	KLLA0E00859g	AFR187C	SAKL0H25608g	KLTH0E06028g
ZYRO0G03630g	TDEL0F01710	Anc_4.26		YLL032C	TBLA0A08490			KNAG0E01010		NCAS0A02920	CAGL0G04037g		KLLA0E00881g	AFR186W	SAKL0H25586g	KLTH0E06050g
ZYRO0G07986g	TDEL0G01690	Anc_4.22		YLL035W	TBLA0A08470			KNAG0E01030		NCAS0A02950		CAGL0D02816g	KLLA0E00815g	AFR189C	SAKL0H25652g	KLTH0E05984g
ZYRO0G08008g	TDEL0G01680	Anc_4.23		YLL034C		TBLA0E01450		KNAG0E01040		NCAS0A02940		CAGL0D02838g	KLLA0E00837g	AFR188W	SAKL0H25630g	KLTH0E06006g
Synteny break 25 – KLE like
Z. rouxii	T. delbrueckii	Inferred ancestor	S. cerevisiae		T. blattae		K. naganishii		N. castellii		C. glabrata		K. lactis	E. gossypii	L. kluyveri	L. thermotolerans
ZYRO0G00616g	TDEL0D02170	Anc_1.349	YFR028C		TBLA0D04930			KNAG0I01530	NCAS0B07280	NCAS0A09040		CAGL0I09064g	KLLA0B06622g	AEL025W	SAKL0D09988g	KLTH0H13156g
ZYRO0G00638g	TDEL0D02180	Anc_1.350	YFR027W			TBLA0D05080	KNAG0C02060		NCAS0B07270			CAGL0I09042g	KLLA0B06644g	AEL024C	SAKL0D09966g	KLTH0H13134g
ZYRO0G04312g	TDEL0D02420	Anc_1.371	YFR012W	YOL019W	TBLA0D04990			KNAG0I01520		NCAS0A08910	CAGL0G08954g		KLLA0A10703g	AEL027W	SAKL0D10054g	KLTH0H13310g
ZYRO0G04334g	TDEL0D02430	Anc_1.372		YOL018C	TBLA0C01180			KNAG0I01500		NCAS0A08900	CAGL0G08932g		KLLA0A10681g	AEL026C	SAKL0D10032g	KLTH0H13288g
ZYRO0G04356g	TDEL0D02440	Anc_5.457		YOR129C	TBLA0A02660	TBLA0A06410	KNAG0B04120		NCAS0H02160				KLLA0E02729g	ACR212C	SAKL0G03058g	KLTH0F15488g
ZYRO0G04378g	TDEL0D02450	Anc_5.456	YDR380W		TBLA0A02670	TBLA0A06420		KNAG0C04790		NCAS0A11830	CAGL0A03102g		KLLA0E02707g	ACR211W	SAKL0G03036g	KLTH0F15510g
ZYRO0G04400g	TDEL0D02460	Anc_5.455		YOR128C	TBLA0A02680		KNAG0B04140		NCAS0H02150			CAGL0K10340g	KLLA0E02685g	ACR210C	SAKL0G03014g	KLTH0F15532g
ZYRO0B02310g	TDEL0A03220	Anc_5.458	YDR381W		TBLA0A02650	TBLA0A06405		KNAG0C04740		NCAS0A11840	CAGL0A03117g		KLLA0E02751g	AFR149C	SAKL0G03080g	KLTH0F15466g
ZYRO0B02332g	TDEL0A03230	Anc_5.459	YDR381C-A		TBLA0A02640			KNAG0C04730		NCAS0A11850	CAGL0A03146g		KLLA0E02773g	AFR148W	SAKL0G03102g	KLTH0F15444g
Synteny break 26 – KLE like
Z. rouxii	T. delbrueckii	Inferred ancestor	S. cerevisiae		T. blattae		K. naganishii		N. castellii		C. glabrata		K. lactis	E. gossypii	L. kluyveri	L. thermotolerans
ZYRO0C09548g	TDEL0H01430	Anc_1.492	YJR052W		TBLA0B02100		KNAG0B00320			NCAS0A13050	CAGL0D06006g		KLLA0A07997g	ACL088C	SAKL0D12188g	KLTH0C03036g
ZYRO0G04796g	TDEL0F00650	Anc_1.495	YJR054W	YML047C		TBLA0D03790	KNAG0B00300	KNAG0G00370	NCAS0G04230	NCAS0A13070	CAGL0D06050g	CAGL0L01463g	KLLA0A08063g	AFR378W	SAKL0D12276g	KLTH0C02970g
ZYRO0G04818g	TDEL0F00660	Anc_1.494	YJR053W				KNAG0B00310			NCAS0A13060	CAGL0D06028g		KLLA0A08041g	ACL090C	SAKL0D12232g	KLTH0C02992g
ZYRO0G04840g	TDEL0F00670	Anc_1.493		YML046W	TBLA0B02090			KNAG0G00380	NCAS0G04220			CAGL0L01441g	KLLA0A08019g	ACL089W	SAKL0D12210g	KLTH0C03014g
ZYRO0G04862g	TDEL0F00680	Anc_2.80		YNL175C		TBLA0B00810	KNAG0F01320		NCAS0G01950			CAGL0J11154g	KLLA0D08206g	ABL134C	SAKL0E12738g	KLTH0B06886g
ZYRO0G04884g	TDEL0F00690	Anc_2.81	YHR146W	YNL173C	TBLA0B09660	TBLA0B00815	KNAG0F01330	KNAG0H03820	NCAS0G01960	NCAS0D00450	CAGL0G05830g	CAGL0J11132g	KLLA0D08184g	ABL133C	SAKL0E12716g	KLTH0B06864g
ZYRO0G04928g	TDEL0F00700	Anc_2.82		YNL172W		TBLA0B00830	KNAG0F01340		NCAS0G01970			CAGL0J06248g	KLLA0D08118g	AFR021W	SAKL0E12650g	KLTH0B06820g
ZYRO0C09570g	TDEL0A01230	Anc_2.79	YDL211C	YNL176C	TBLA0B09680		KNAG0F01310		NCAS0G01940	NCAS0D00440	CAGL0G05808g	CAGL0J11176g	KLLA0D08239g	ABL135C	SAKL0E12760g	KLTH0B06908g
ZYRO0C09592g	TDEL0A01220	Anc_2.78		YNL177C	TBLA0B09690		KNAG0F01300		NCAS0G01930			CAGL0J11198g	KLLA0D08261g	ABL136C	SAKL0E12782g	KLTH0B06930g
Synteny break 27 – KLE like
Z. rouxii	T. delbrueckii	Inferred ancestor	S. cerevisiae		T. blattae		K. naganishii		N. castellii		C. glabrata		K. lactis	E. gossypii	L. kluyveri	L. thermotolerans
ZYRO0G03608g	TDEL0F01720	Anc_4.25		YLL033W	TBLA0A08480			KNAG0E01020		NCAS0A02930		CAGL0D02860g	KLLA0E00859g	AFR187C	SAKL0H25608g	KLTH0E06028g
ZYRO0G03630g	TDEL0F01710	Anc_4.26		YLL032C	TBLA0A08490			KNAG0E01010		NCAS0A02920	CAGL0G04037g		KLLA0E00881g	AFR186W	SAKL0H25586g	KLTH0E06050g
ZYRO0G07986g	TDEL0G01690	Anc_4.22		YLL035W		TBLA0A08470		KNAG0E01030		NCAS0A02950		CAGL0D02816g	KLLA0E00815g	AFR189C	SAKL0H25652g	KLTH0E05984g
ZYRO0G08008g	TDEL0G01680	Anc_4.23		YLL034C	TBLA0E01450			KNAG0E01040		NCAS0A02940		CAGL0D02838g	KLLA0E00837g	AFR188W	SAKL0H25630g	KLTH0E06006g
ZYRO0G08030g	TDEL0G01670	Anc_4.24	YHL026C		TBLA0E01460		KNAG0J02840				CAGL0E03740g
ZYRO0G08052g	TDEL0G01660	Anc_6.179	YGL093W		TBLA0B05230		KNAG0F02180			NCAS0D03610		CAGL0H03047g	KLLA0E18943g	AFL058C	SAKL0A05368g	KLTH0H04994g
ZYRO0G08074g	TDEL0G01650	Anc_6.180	YGL092W			TBLA0A01880	KNAG0F02170			NCAS0D03620		CAGL0H03069g	KLLA0E18965g	AFL059C	SAKL0A05346g	KLTH0H04972g
ZYRO0G08096g	TDEL0G01640	Anc_6.181	YGL091C			TBLA0A01890	KNAG0F02160			NCAS0D03630		CAGL0H03091g	KLLA0E18987g	AFL060W	SAKL0A05324g	KLTH0H04950g
ZYRO0G03586g	TDEL0F01740	Anc_6.177		YPL183C		TBLA0A01870		KNAG0M00450	NCAS0H01060		CAGL0C01441g		KLLA0E18899g	AFL056C	SAKL0A05412g	KLTH0H05038g
Zrou_YGOB_Anc_6.178	TDEL0F01730	Anc_6.178		YPL183W-A	TBLA0B05240			KNAG0M00440	NCAS0H01050		CAGL0C01435g		KLLA0E18921g	AFL057W	SAKL0A05390g	KLTH0H05016g
Synteny break 28 – ZT like
Z. rouxii	T. delbrueckii	Inferred ancestor	S. cerevisiae		T. blattae		K. naganishii		N. castellii		C. glabrata		K. lactis	E. gossypii	L. kluyveri	L. thermotolerans
ZYRO0G13244g	TDEL0B00940	Anc_8.803		YMR252C	TBLA0D00270		KNAG0J00510			NCAS0C00640		CAGL0H02541g	KLLA0B08778g	AGL213W	SAKL0D02464g	KLTH0C04774g
ZYRO0G13288g	TDEL0B00930	Anc_8.804		YMR253C		TBLA0B02690	KNAG0J00500			NCAS0C00630		CAGL0H02519g			SAKL0D02442g	KLTH0C04752g
ZYRO0G12628g	TDEL0D03270	Anc_3.300		YBR077C		TBLA0G03260	KNAG0J02270		NCAS0I01440			CAGL0M01848g	KLLA0F11638g	AGL204C	SAKL0D02552g	KLTH0C04840g
ZYRO0G12650g	TDEL0D03260	Anc_3.301	YDR054C			TBLA0G03270	KNAG0J02280	KNAG0H01040	NCAS0I01430	NCAS0A10770	CAGL0E04598g		KLLA0D09196g	AGL203C	SAKL0D02530g	KLTH0C04818g
ZYRO0G12672g	TDEL0D03240												KLLA0B08800g		SAKL0D02486g	KLTH0C04796g
ZYRO0G12694g	TDEL0D03230	Anc_3.302	YDR055W	YBR078W	TBLA0I02080		KNAG0J02300	KNAG0H01030	NCAS0I01420	NCAS0A10780	CAGL0E04620g	CAGL0M01826g	KLLA0C14454g	ABL063C	SAKL0B06336g	KLTH0E14124g
ZYRO0G12716g	TDEL0D03220	Anc_3.303		YBR079C		TBLA0G03280	KNAG0J02310		NCAS0I01410			CAGL0M01804g	KLLA0C14498g	ABL065W	SAKL0B06380g	KLTH0E14168g
ZYRO0G12738g	TDEL0D03210	Anc_3.304		YBR080C	TBLA0I02090	TBLA0G03290	KNAG0J02320		NCAS0I01400		CAGL0E04642g	CAGL0M01782g	KLLA0C14520g	AER169C	SAKL0B06402g	KLTH0E14190g
ZYRO0F12826g	TDEL0B00960	Anc_8.801	YMR250W				KNAG0J00520		NCAS0C00660			CAGL0H02585g	KLLA0C14432g		SAKL0B06314g	KLTH0E14080g
ZYRO0F12848g	TDEL0B00950	Anc_8.802	YMR251W-A	YOL052C-A		TBLA0B02700		KNAG0G03265	NCAS0C00650	NCAS0B00970		CAGL0H02563g	Klac_YGOB_KLTH0E14102g	ABL061CA	Sklu_YGOB_ABL061CA	KLTH0E14102g
Synteny break 29 – KLE like
Z. rouxii	T. delbrueckii	Inferred ancestor	S. cerevisiae		T. blattae		K. naganishii		N. castellii		C. glabrata		K. lactis	E. gossypii	L. kluyveri	L. thermotolerans
ZYRO0B11044g	TDEL0A01620	Anc_8.202		YER151C	TBLA0B01930		KNAG0G01670			NCAS0A03840		CAGL0I06600g	KLLA0E01013g	AGR139C	SAKL0H18656g	KLTH0H07370g
ZYRO0B11066g	TDEL0A01610	Anc_8.203	YDR078C		TBLA0B01910			KNAG0D01850	NCAS0B04180		CAGL0K10142g		KLLA0E00991g	AGR140C	SAKL0H18634g	KLTH0H07348g
ZYRO0G14850g	TDEL0B04110	Anc_8.199	YDR075W		TBLA0A08610		KNAG0G01650			NCAS0A03850	CAGL0K10208g		KLLA0E10055g	AGR136W	SAKL0H18744g	KLTH0H07458g
ZYRO0G14872g	TDEL0B04100	Anc_8.200	YDR076W			TBLA0B08060		KNAG0D01870	NCAS0B04200		CAGL0K10186g		KLLA0E01079g	AGR137W	SAKL0H18722g	KLTH0H07436g
ZYRO0G14894g	TDEL0B04090	Anc_8.201	YDR077W	YER150W	TBLA0A08630	TBLA0B08070	KNAG0G01660	KNAG0D01860	NCAS0B04190		CAGL0K10164g	CAGL0I06644g	KLLA0E01057g	AGR138W	SAKL0H18700g	KLTH0H07414g
ZYRO0G14916g	TDEL0B04080	Anc_6.146	YBR235W			TBLA0A01770	KNAG0M00680			NCAS0H01300		CAGL0K07073g	KLLA0F10549g	AFL025C	SAKL0A06248g	KLTH0H05896g
ZYRO0G14938g	TDEL0B04070	Anc_6.147	YBR236C		TBLA0D03510		KNAG0M00670			NCAS0H01290		CAGL0K07051g	KLLA0F10527g	AFL026W	SAKL0A06226g	KLTH0H05874g
ZYRO0G14960g	TDEL0B04060	Anc_6.148	YBR237W		TBLA0D03520		KNAG0M00660			NCAS0H01280		CAGL0K07029g	KLLA0F10505g	AFL027C	SAKL0A06204g	KLTH0H05852g
ZYRO0C14784g	TDEL0A01640	Anc_6.144		YGL111W	TBLA0D03490		KNAG0M00690			NCAS0H01310	CAGL0F07403g		KLLA0F10593g	AFL023C	SAKL0A06292g	KLTH0H05940g
ZYRO0C14806g	TDEL0A01630	Anc_6.145		YGL110C	TBLA0D03500			KNAG0F02340	NCAS0D03410		CAGL0F07425g		KLLA0F10571g	AFL024W	SAKL0A06270g	KLTH0H05918g
Synteny break 30 – ZT like
Z. rouxii	T. delbrueckii	Inferred ancestor	S. cerevisiae		T. blattae		K. naganishii		N. castellii		C. glabrata		K. lactis	E. gossypii	L. kluyveri	L. thermotolerans
ZYRO0B07854g	TDEL0E01710	Anc_4.202		YLR362W	TBLA0A08290			KNAG0B05880	NCAS0J00960			CAGL0B02739g	KLLA0B13112g	ABL011C	SAKL0B05082g	KLTH0E04334g
ZYRO0B07876g	TDEL0E01720	Anc_4.201		YLR361C-A	TBLA0A08300			KNAG0B05870	NCAS0J00950			CAGL0B02755g	KLLA0B13123g	ABL010W	SAKL0B05060g	Kthe_YGOB_Anc_4.201
ZYRO0G15598g	TDEL0B03470	Anc_8.763		YOR294W		TBLA0D00910	KNAG0J00750			NCAS0B00700		CAGL0G07535g	KLLA0B13046g	ABL014C	SAKL0B05148g	KLTH0E04268g
ZYRO0G15620g	TDEL0B03480	Anc_8.762	YMR232W			TBLA0D00920	KNAG0J00760		NCAS0C00870		CAGL0M04917g		KLLA0B13068g	ABL013C	SAKL0B05126g	KLTH0E04290g
ZYRO0G15642g	TDEL0B03490	Anc_8.761	YMR231W		TBLA0B03370		KNAG0J00770		NCAS0C00880		CAGL0M04895g		KLLA0B13090g	ABL012C	SAKL0B05104g	KLTH0E04312g
ZYRO0G15664g	TDEL0B03500	Anc_8.760	YMR230W	YOR293W		TBLA0D00930	KNAG0J02190	KNAG0G03030	NCAS0C00890	NCAS0B00690	CAGL0M04873g		KLLA0B08173g	AFR569W	SAKL0H04356g	KLTH0D13222g
ZYRO0G15686g	TDEL0B03510	Anc_8.759		YOR292C	TBLA0B03380	TBLA0D00940		KNAG0G03020		NCAS0B00680		CAGL0M11330g	KLLA0B08195g	AFR568C	SAKL0H04378g	KLTH0D13200g
ZYRO0G15708g	TDEL0B03520	Anc_8.758		YOR291W		TBLA0D00950		KNAG0G03010		NCAS0B00670		CAGL0M11308g	KLLA0B08217g	AFR567W	SAKL0H04400g	KLTH0D13178g
ZYRO0B07810g		Anc_4.204	YGR059W		TBLA0A08270		KNAG0D04110			NCAS0A02230	CAGL0K04455g		KLLA0B08129g	AFR571W	SAKL0H04312g
ZYRO0B07832g	TDEL0E01700	Anc_4.203	YGR058W		TBLA0A08280		KNAG0D04100			NCAS0A02220	CAGL0K04433g		KLLA0B08151g	AFR570W	SAKL0H04334g	KLTH0D13244g
Synteny break 31 – KLE like
Z. rouxii	T. delbrueckii	Inferred ancestor	S. cerevisiae		T. blattae		K. naganishii		N. castellii		C. glabrata		K. lactis	E. gossypii	L. kluyveri	L. thermotolerans
ZYRO0D02002g	TDEL0H00740	Anc_7.496		YER020W		TBLA0J00340	KNAG0F03680			NCAS0A14970	CAGL0I08195g		KLLA0D10956g	ABR158W	SAKL0F14608g	KLTH0E01408g
Zrou_YGOB_Anc_7.495	TDEL0H00750	Anc_7.495	Scer_YGOB_Anc_7.495		TBLA0F02810			KNAG0D01200	NCAS0H00400			CAGL0C04933g	KLLA0F03179g	Agos_YGOB_Anc_7.495	SAKL0F14630g	KLTH0E01430g
ZYRO0G18106g	TDEL0C03560	Anc_7.493		YBL050W	TBLA0F02790		KNAG0F03670			NCAS0C00530	CAGL0F04653g		KLLA0E05919g	ABR155C	SAKL0F14696g	KLTH0E01518g
ZYRO0G18128g	TDEL0C03570	Anc_7.494	YJR109C		TBLA0F02800			KNAG0D01210	NCAS0H00410			CAGL0C04917g	KLLA0F03190g	ABR157W	SAKL0F14652g	KLTH0E01452g
ZYRO0G18150g	TDEL0C03580	Anc_1.195	YJL153C			TBLA0C02070		KNAG0C02520	NCAS0I02750		CAGL0I06050g		KLLA0D16412g		SAKL0F00396g
ZYRO0G18172g	TDEL0C03590	Anc_1.194		YKR066C		TBLA0C05910	KNAG0C01140			NCAS0B08220		CAGL0K08184g	KLLA0B07557g		SAKL0C05786g	KLTH0F05170g
ZYRO0G18194g	TDEL0C03600	Anc_1.193	YJL154C		TBLA0A06270	TBLA0C05900	KNAG0C01130		NCAS0I02760	NCAS0B08230	CAGL0I06072g		KLLA0B07535g	AEL107W	SAKL0C05764g	KLTH0F05148g
ZYRO0G18216g	TDEL0C03610	Anc_1.192	YJL155C		TBLA0A06260		KNAG0C01120	KNAG0C02510	NCAS0I02770		CAGL0I06094g		KLLA0B07513g	AEL106W	SAKL0C05742g	KLTH0F05126g
ZYRO0D02024g	TDEL0H00760	Anc_1.196		YKR065C		TBLA0C05920	KNAG0C01150			NCAS0B08210	CAGL0M05929g		KLLA0A06083g	ADR328W	SAKL0C05808g	KLTH0F05192g
ZYRO0D02046g	TDEL0H00770	Anc_1.197	YJL151C					KNAG0C02530	NCAS0J00940						SAKL0C05830g	KLTH0F05214g
Synteny break 32 – ZT like
Z. rouxii	T. delbrueckii	Inferred ancestor	S. cerevisiae		T. blattae		K. naganishii		N. castellii		C. glabrata		K. lactis	E. gossypii	L. kluyveri	L. thermotolerans
ZYRO0B09086g	TDEL0D02090	Anc_1.341		YBR261C	TBLA0F03410			KNAG0C01870	NCAS0B07330		CAGL0I09240g		KLLA0F02101g	AFR615W	SAKL0D07348g	KLTH0H11110g
ZYRO0B09108g	TDEL0D02080	Anc_1.340		YBR262C	TBLA0F03400			KNAG0C01860	NCAS0B07340		CAGL0I09262g		KLLA0F02079g	AFR614W	SAKL0D07326g	KLTH0H11088g
ZYRO0G21032g	TDEL0D01720
ZYRO0G21054g	TDEL0D01710	Anc_1.304		YBR282W		TBLA0C02610		KNAG0C01670	NCAS0B07550			CAGL0B03267g	KLLA0F02035g	AFR618C	SAKL0D07282g	KLTH0H11044g
ZYRO0G21076g	TDEL0D01700	Anc_1.303		YBR283C		TBLA0C02600		KNAG0C01660	NCAS0B07560			CAGL0B03245g	KLLA0F02057g	AFR613C	SAKL0D07304g	KLTH0H11066g
ZYRO0G21120g	TDEL0D01690	Anc_1.302	YJL070C	YBR284W		TBLA0C02680	KNAG0B05270		NCAS0B07570	NCAS0A09290	CAGL0H02893g			ADR119W	SAKL0D06380g	KLTH0H10208g
ZYRO0G21142g	TDEL0D01680	Anc_1.301	YJL071W			TBLA0C02700	KNAG0B05260			NCAS0A09300	CAGL0H02871g		KLLA0D06523g	ADR120C	SAKL0D06336g	KLTH0H10186g
ZYRO0G21164g	TDEL0D01670	Anc_1.300	YJL072C		TBLA0D05290		KNAG0B05250			NCAS0A09310	CAGL0H02849g		KLLA0D06501g	ADR121W	SAKL0D06314g	KLTH0H10164g
ZYRO0B09130g	TDEL0D02070	Anc_1.339		YBR263W	TBLA0F03390			KNAG0C01850	NCAS0B07350		CAGL0I09284g		KLLA0F01210g	AEL188W	SAKL0D06468g	KLTH0H10252g
ZYRO0B09152g	TDEL0D02060	Anc_1.338		YBR264C				KNAG0C01840	NCAS0B07360		CAGL0I09306g		KLLA0F01232g	AEL187C	SAKL0D06490g	KLTH0H10274g
