# Supplementary material for: Beyond the Whole-Genome Duplication: Phylogenetic Evidence for an Ancient Interspecies Hybridization in the Baker's Yeast Lineage
Source: PLOS journal article supplement (doi:10.1371/journal.pbio.1002220), 2015-08-07

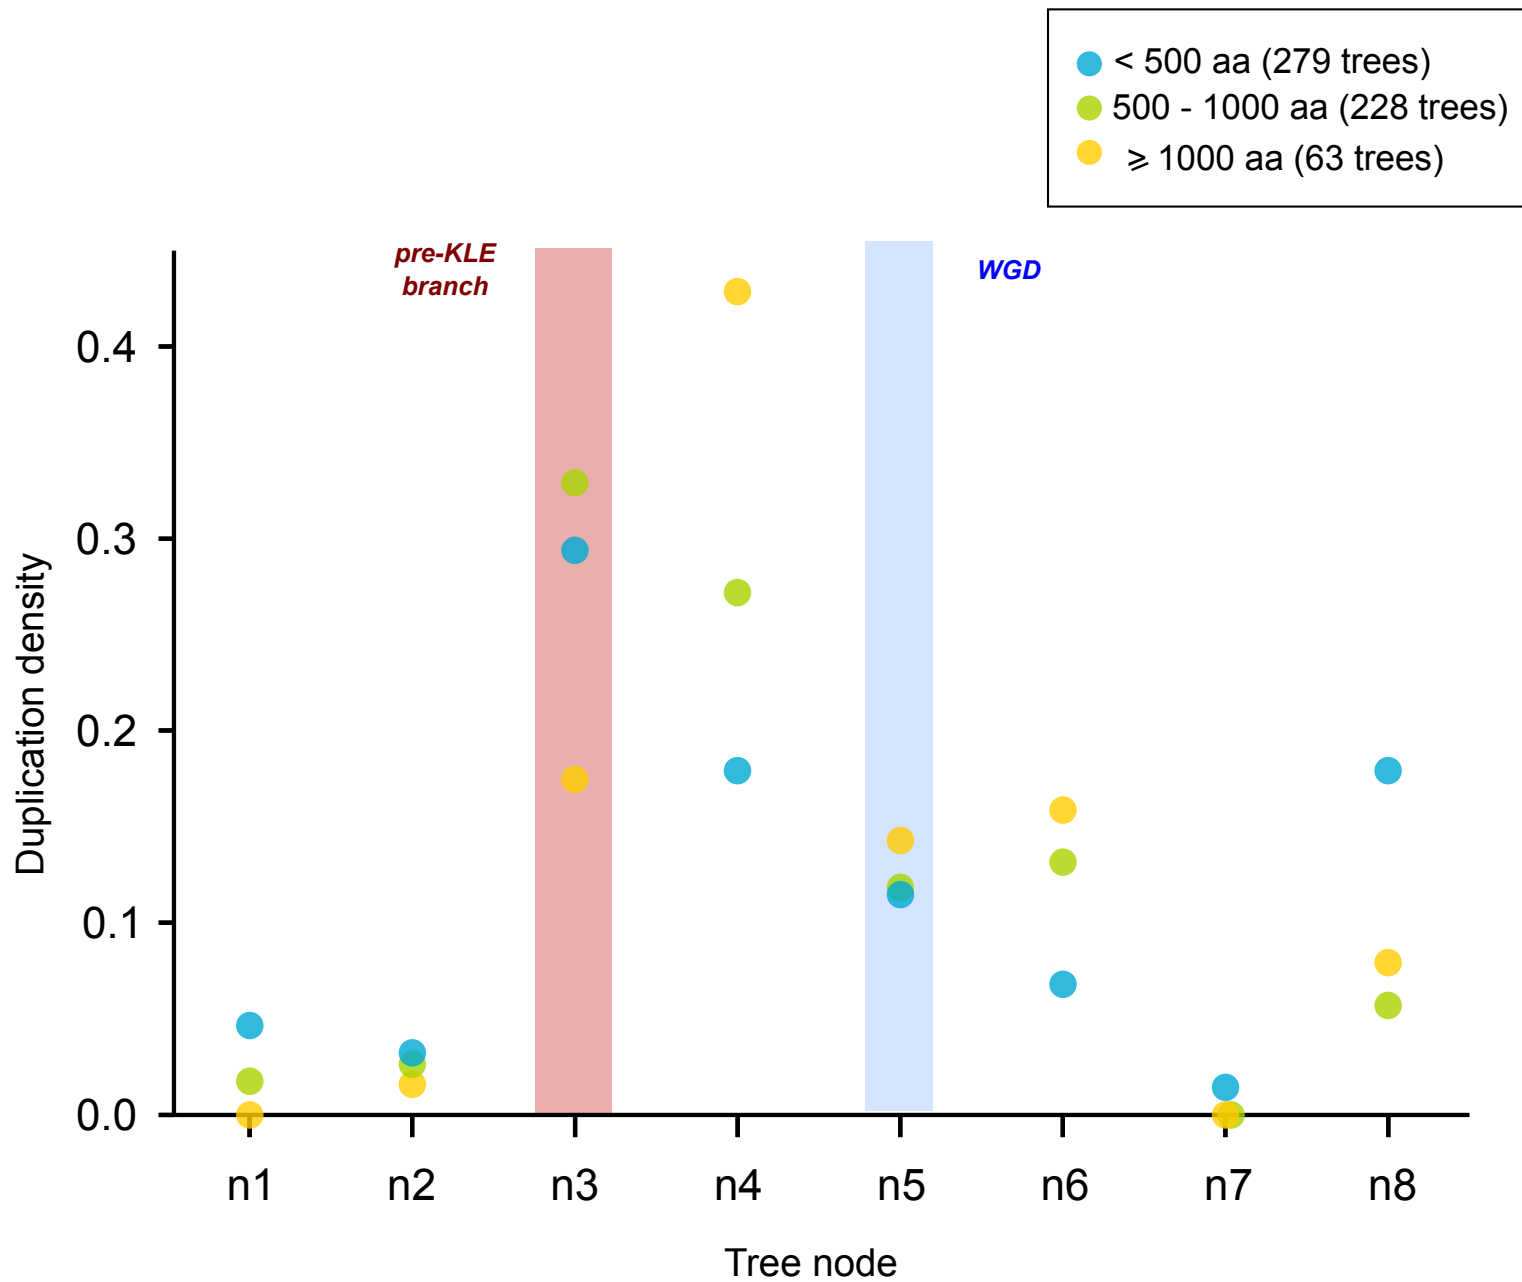

Supplement: S6 (10.1371/journal.pbio.1002220.s006) [file journal.pbio.1002220.s006]
